# Supplementary material for: Onset of human preterm and term birth is related to unique inflammatory transcriptome profiles at the maternal fetal interface
Source: PeerJ journal article supplement (doi:10.7717/peerj.3685), 2017-09-01

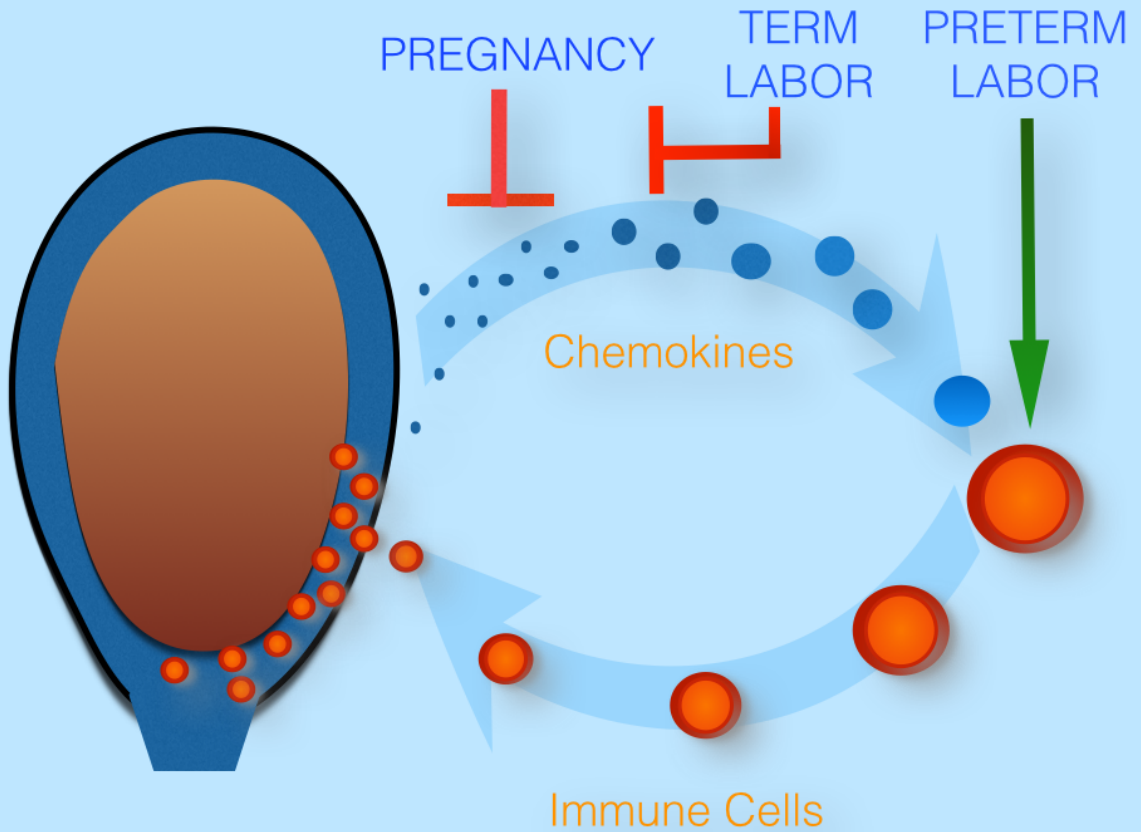

Supplement: Figure_S1.pdf [file Figure_S1.pdf]
